# Supplementary material
Source: publisher figshare collection journal article supplement (https://gsajournals.figshare.com/ndownloader/files/20397858)
Supplement: Supplementary file 1 [file 20397858]

## Sheet: Full
				Canopy Wilting Score
Accession	Name	Countrya	MGb	ALL	GA-15	GA-16	KS-15	KS-16	Rank	Beneficial Allelesc	Breeding Valued
PI603535	Hei zong huang dou	China	VIII	5.61756	10	5.80357	5.83333	0.833333	1	18	-31.803
PI603513A	Xiao niu mao huang	China	VIII	6.95685	9.16667	7.41071	6.25	5	2	23	-19.1178
PI603529	Hei huang dou	China	VIII	7.89683	11.6667	10.3571	-	1.66667	3	15	15.5526
PI603513B	-	China	VIII	8.45238	12.5	9.52381	-	3.33333	4	28	-17.3295
PI603534A	Da niu mao huang	China	VII	7.56845	6.66667	11.6071	7.5	4.5	5	26	-15.6219
PI219698	Kulat	Pakistan	VI	10.4861	17.5	10.625	-	3.33333	6	25	-32.4565
PI532458	Ba yue bao	China	VIII	9.83631	23.3333	10.1786	3.33333	2.5	7	22	-25.0056
PI269518B	(Koolat)	Pakistan	VI	10.8155	20.8333	8.77976	-	2.83333	8	22	-25.1621
PI567405	Wei zi dou	China	VI	8.62798	10	11.8452	6.66667	6	9	27	5.93388
PI603521	Huang dou	China	VIII	9.91815	17.5	8.42262	8.75	5	10	16	-14.8602
PI603534B	(Da niu mao huang)	China	VIII	9.09226	13.3333	12.619	7.91667	2.5	11	23	0.521977
PI429328	-	Nigeria	VIII	10.3943	24.1667	12.4107	4.16667	0.833333	12	25	-17.6204
PI603536	Hui huang dou	China	VIII	10.2679	18.3333	10.2381	8.33333	4.16667	13	27	-33.5632
PI603537D	(Niu yan jing quan zi)	China	VII	10.0461	15.8333	15.6845	3.33333	5.33333	14	26	-22.0132
PI603528	Hei ke zha	China	VII	9.44643	11.6667	10.4524	10.8333	4.83333	15	26	-23.9279
PI567315	Hong huang dou	China	VII	9.34375	9.16667	16.0417	5.83333	6.33333	16	25	-9.65422
PI210349	Jubiltan 65	Mozambique	VIII	12.3115	25	8.60119	-	3.33333	17	26	-14.983
PI567326B	(Huang dou)	China	VI	10.9658	18.3333	12.5298	6.66667	6.33333	18	26	-3.92862
PI567316B	(Hong huang dou)	China	VI	9.89087	7.5	16.3393	-	5.83333	19	28	-19.3557
PI497967	-	India	VII	12.3373	19.1667	13.8452	-	4	20	28	-3.94812
PI212605	-	Afghanistan	VI	11.0298	17.5	14.7024	7.91667	4	21	29	-35.1727
PI434981	Indo 226	Central African Republic	VIII	12.7976	25.8333	10.8929	-	1.66667	22	22	-15.9838
PI567349B	(Shu pi huang dou)	China	VI	10.1458	10.8333	14.5833	6.66667	8.5	23	25	-1.84255
PI486330	Macs-75	India	VIII	11.5625	24.1667	11.6667	7.91667	2.5	24	21	-20.4046
PI323570	-	India	VII	11.3735	19.1667	11.1607	7.5	7.66667	25	23	-7.40782
PI567356	Zao bai huang dou	China	VI	9.95536	9.16667	11.4881	11.6667	7.5	26	16	6.83211
PI567394B	-	China	VI	10.0238	8.33333	18.5119	5.83333	7.41667	27	27	-4.95732
PI567295	Bian huang dou	China	VIII	11.3988	17.5	16.8452	7.08333	4.16667	28	27	-15.6346
PI567345	Niu mao huang	China	VI	9.85565	9.16667	14.256	9.16667	6.83333	29	30	-21.6976
PI567314	Hei you huang dou	China	VI	12.3393	15.8333	14.8512	-	6.33333	30	26	17.1678
PI603517B	-	China	VI	11.3899	16.6667	15.0595	7.5	6.33333	31	28	-10.5805
PI567406B	(Wu se da dou)	China	VI	9.8869	5.83333	13.6607	-	10.1667	32	26	-9.62996
PI603512	Jin man dou	China	VI	11.7976	16.6667	17.4405	5.41667	7.66667	33	17	-11.3684
NTCPR94-5157	-	United States	VI	12.3318	21.6667	9.91071	7.08333	10.6667	34	24	-21.0956
PI603540A	Hei huang dou	China	VII	11.6533	15.8333	15.0298	7.91667	7.83333	35	27	-8.75558
PI374180	-	India	VIII	12.7381	24.1667	11.369	4.58333	10.8333	36	19	-19.1168
PI486329	-	India	VIII	12.6786	24.1667	9.88095	9.16667	7.5	37	26	-14.0302
PI603517A	Lao shu pi	China	VI	12.6518	20	18.6905	7.08333	4.83333	38	26	-15.4417
PI407738	-	China	VI	11.9836	15	19.2262	6.875	6.83333	39	24	16.4417
PI486328	Birsa Soybean-1	India	VIII	12.9241	25	9.19643	5.83333	11.6667	40	20	-22.1429
PI330634	-	South Africa	VII	12.6131	21.6667	13.0357	8.75	7	41	19	-30.686
PI603509	Huang dou	China	VIII	13.006	28.3333	11.6071	10.4167	1.66667	42	26	-9.62017
PI381661	Bukalasa 6	Uganda	VIII	13.9881	33.3333	15.119	5	2.5	43	21	-7.51415
PI567378	Ba yue zha	China	VI	11.8229	10	16.875	5.41667	15	44	26	-5.08005
PI171441	Mud-bean	China	VI	14.371	19.1667	17.1131	-	6.83333	45	28	-7.53155
PI381680	S7	Uganda	VII	13.9955	25	10.9821	11.6667	8.33333	46	22	-23.9758
N05-7432	-	United States	VIII	14.0997	22.5	17.6488	9.58333	6.66667	47	22	-18.6225
PI567394A	Jiu yue han	China	VI	14.9127	17.5	19.4048	-	7.83333	48	24	-22.6381
N06-7194	-	United States	VIII	14.1592	23.3333	15.3869	8.75	9.16667	49	22	-17.54
PI603520	Huang dou	China	VI	14.5893	25.8333	12.4405	14.5833	5.5	50	25	-25.6023
PI567334	Jiang dou zi	China	VI	14.2426	20	20.3869	5.41667	11.1667	51	25	-12.1177
PI567393	Jiu yue han	China	VII	14.9226	21.6667	23.2738	5.41667	9.33333	52	25	-9.73159
N04-9646	-	United States	VII	14.6711	28.3333	10.6845	16.6667	3	53	23	-15.6999
PI603519	Lu da dou	China	VI	13.314	14.1667	15.0893	17.5	6.5	54	27	-12.3282
PI603506	Xiao ke zao huang dou	China	VI	14.6548	22.5	20.119	7.5	8.5	55	23	3.81181
PI346300	-	India	VII	15.2277	30	10.3274	14.5833	6	56	22	-19.6593
PI567350B	(Shu pi huang dou)	China	VI	14.506	20	19.1071	6.25	12.6667	57	20	13.0777
PI429330	-	Nigeria	VIII	15.9524	25	12.8571	-	10	58	25	-22.0663
PI548983	Tracy	United States	VI	14.5298	17.5	18.869	12.0833	9.66667	59	25	-12.3221
PI639572	-	Ghana	VIII	14.2271	15.8333	10.6667	12.9083	17.5	60	30	-33.4738
PI462312	Ankur	India	VIII	15.4688	25.8333	12.7083	6.66667	16.6667	61	28	-29.1169
PI428691	-	India	VIII	15.625	23.3333	11.25	11.25	16.6667	62	28	-37.1012
PI639576	-	Burundi	VIII	15.63	27.5	14.1865	10	10.8333	63	27	-9.74046
PI567404B	(Wang shan hou)	China	VI	16.9187	19.1667	24.256	-	7.33333	64	29	1.92594
PI567683B	(Zheng zhou niu yao qi)	China	VI	16.5625	27.5	22.9167	6.66667	9.16667	65	26	5.75611
PI247678	Herman	Zaire	VIII	16.2723	30.8333	13.4226	9.16667	11.6667	66	25	-12.9057
PI089775	-	China	VI	16.3175	15	19.2857	-	14.6667	67	25	-0.291318
PI567412	Yi wo feng	China	VI	17.4881	20	24.4643	-	8	68	29	-10.7334
PI548989	Ransom	United States	VII	16.1027	25.8333	12.8274	12.9167	12.8333	69	19	-22.1759
PI323569	-	India	VII	19.5933	39.1667	12.9464	-	6.66667	70	27	-15.8984
PI203406	-	South Africa	VIII	17.8869	25.8333	13.631	5.41667	26.6667	71	22	-16.3776
PI171443	Tea-bean	China	VI	16.5298	20.8333	23.869	14.5833	6.83333	72	22	-8.71054
PI567329	Huang huang dou	China	VI	17.3467	28.3333	17.0536	5.83333	18.1667	73	27	-5.00018
PI548980	Hood	United States	VI	16.9792	22.5	24.5833	10	10.8333	74	21	-23.6259
PI603514	Ni ba dou	China	VI	16.8259	25.8333	19.9702	15	6.5	75	19	-10.0379
PI265498	-	Zaire	VIII	18.6607	35.8333	9.64286	7.5	21.6667	76	21	-15.1414
PI548656	Lee	United States	VI	16.7381	23.3333	12.619	15.8333	15.1667	77	21	-17.0671
PI567205	GL2671/89	Georgia	VI	16.9807	23.3333	21.756	15	7.83333	78	27	2.23068
PI416937	Houjaku Kuwazu	Japan	VI	18.4494	39.1667	15.7143	8.33333	10.5833	79	23	-34.0972
PI090406	-	China	VI	17.7188	22.5	26.0417	11.6667	10.6667	80	24	-14.1562
PI553045	Cook	United States	VIII	17.7158	24.1667	12.1131	12.9167	21.6667	81	23	-22.3938
PI221715	-	South Africa	VII	17.0491	23.3333	16.6964	15.8333	12.3333	82	23	-23.2893
PI429329	-	Nigeria	VII	18.8199	37.5	18.2798	4.58333	14.9167	83	27	-18.4294
PI567410C	-	China	VII	18.381	32.5	23.6905	7.08333	10.25	84	28	16.4457
PI567386	Huang da dou (1)	China	VI	18.5774	30.8333	27.1429	7.5	8.83333	85	31	11.6551
PI615694	N7001	United States	VII	17.3914	19.1667	24.3155	12.9167	13.1667	86	26	-26.7089
PI145079	Hernon No. 6	Zimbabwe	VII	17.9182	22.5	19.4643	19.375	10.3333	87	23	-42.3238
WOODRUFF	-	United States	VII	17.7351	21.875	20.5655	12.5	16	88	22	-15.9765
G00-3213	-	United States	VII	17.6696	24.1667	18.9286	14.5833	13	89	23	-17.5992
PI567403A	Shuan huang dou	China	VII	18.4524	31.6667	20.0595	16.25	5.83333	90	26	11.2733
PI090495	-	China	VI	18.4866	28.3333	25.0298	8.75	11.8333	91	22	-35.6073
PI567332	Huo huang dou	China	VI	19.061	32.5	21.5774	12.5	9.66667	92	27	-6.58425
PI603532	Hong li huang dou	China	VI	18.7054	29.1667	22.3214	12.5	10.8333	93	27	-13.1957
PI322694	Hernnon	Zimbabwe	VI	19.1756	34.1667	19.7024	14.1667	8.66667	94	24	-6.46351
FC003659	Da Wu Don	China	VI	18.9167	22.5	27.0833	11.25	14.8333	95	22	-16.1985
PI437126B	-	Georgia	VI	18.8646	28.3333	21.4583	10.8333	14.8333	96	22	-20.0948
PI090499	Black and white	China	VI	18.7679	24.1667	23.1548	8.75	19	97	25	-26.6608
PI553046	Gasoy 17	United States	VII	19.9494	38.3333	12.7976	12.5	16.1667	98	21	-16.3735
PI170890	-	South Africa	VI	19.0238	28.3333	23.0952	12.5	12.1667	99	20	-12.5913
PI603538C	(Wan dou zao)	China	VIII	18.8839	21.6667	23.0357	12.5	18.3333	100	21	-8.72688
PI417561	48.S.103 DL/63/180	South Africa	VI	20.061	18.3333	24.9107	27.5	9.5	101	13	-7.11254
PI205384	-	Pakistan	VI	19.0119	31.6667	15.2976	14.5833	14.5	102	23	-23.2067
PI522236	Thomas	United States	VII	21.506	46.6667	10.3571	13.3333	15.6667	103	23	-24.5953
PI381657	3H55 F4/9/2	Uganda	VIII	19.2113	30.8333	21.0119	11.6667	13.3333	104	22	-20.3349
PI437126C	-	Georgia	VI	19.6667	29.1667	19.1667	20.8333	9.5	105	29	-3.02247
PI322695	Bicolor do Cuima	Angola	VI	21.6875	45.8333	17.9167	7.5	15.5	106	26	-12.8318
PI647085	N7002	United States	VII	19.5774	30	20.4762	11.25	16.5833	107	26	-30.1101
PI603539A	Huang dou	China	VI	19.2738	28.3333	20.0119	17.0833	11.6667	108	24	-22.9898
PI159093	34S51	South Africa	VII	19.2887	30	17.3214	15.8333	14	109	20	-29.0196
PI159095	41S31	South Africa	VII	20.436	38.3333	20.3274	11.25	11.8333	110	22	-22.0093
PI508266	Young	United States	VI	19.6741	30	20.8631	12.5	15.3333	111	25	-18.1511
PI376069	DRO 9	Cameroon	VIII	21.9494	37.5	11.131	12.5	26.6667	112	26	-30.2611
PI567207	-	Georgia	VI	19.8958	28.3333	24.5833	11.6667	15	113	24	-10.8983
PI221716	-	South Africa	VII	19.875	30	19.1667	19.1667	11.1667	114	26	-31.3735
PI531068	Stonewall	United States	VII	22.3467	44.1667	16.2202	6.66667	22.3333	115	16	-2.88627
PI567410A	Yang huang dou	China	VII	19.7768	20	29.5238	16.6667	12.9167	116	28	11.639
PI612157	Prichard	United States	VIII	20.558	25	14.3155	25.4167	17.5	117	27	-13.4513
N06-7543	-	United States	VII	20.131	33.3333	22.0238	17.0833	8.08333	118	20	-15.8896
PI567206	GL2674/90	Georgia	VI	19.7009	26.6667	23.7202	14.5833	13.8333	119	28	-27.5761
PI602597	Boggs	United States	VI	20.7768	37.5	14.5238	14.5833	16.5	120	22	-16.4544
PI548975	Centennial	United States	VI	20.7262	35	21.9048	9.16667	16.8333	121	20	-15.0587
PI548657	Jackson	United States	VII	21.2188	35.8333	21.875	10	17.1667	122	16	-14.3801
PI221714	-	South Africa	VI	22.0283	32.5	31.2798	14.1667	10.1667	123	18	-24.0454
PI639575	-	Burundi	VIII	21.875	36.6667	16.6667	21.6667	12.5	124	30	-19.1009
PI374220	Geduld	South Africa	VI	21.4583	34.1667	22.0833	19.5833	10	125	25	-16.2784
PI381683	S36	Uganda	VI	21.2307	28.3333	25.9226	14.1667	16.5	126	24	-13.6339
PI548659	Braxton	United States	VII	20.9955	30.8333	18.8988	15.4167	18.8333	127	20	-0.239446
PI341264	-	Liberia	VI	21.2217	25.8333	21.6369	16.6667	20.75	128	26	-23.7421
PI567403B	-	China	VII	22.5372	36.6667	24.7321	12.0833	16.6667	129	26	-7.17215
PI322689	Improved	Angola	VII	22.3244	35.8333	24.4643	15	14	130	23	-14.0816
PI438430	-	Israel	VII	22.0387	26.6667	28.9881	16.6667	15.8333	131	25	-29.2744
PI595645	Benning	United States	VII	23.2128	37.5	24.4345	11.25	19.6667	132	23	-1.84173
PI639574	-	Burundi	VIII	23.5789	36.6667	30.1488	14.1667	13.3333	133	28	-35.052
PI555453	Hagood	United States	VII	22.817	31.6667	17.3512	21.25	21	134	18	-4.26938
PI592756	Dillon	United States	VI	22.2738	30	25.5952	15.8333	17.6667	135	20	-7.9977
PI641156	NC-Raleigh	United States	VII	23.9896	43.3333	17.2917	16.6667	18.6667	136	18	-21.5918
PI090768	-	China	VI	24.6414	40.8333	29.7321	14.1667	13.8333	137	20	-1.29981
PI430736	Kudu	Zimbabwe	VI	24.3854	37.5	20.2083	22.5	17.3333	138	16	-5.1452
PI324067	Hernon 237	Zimbabwe	VII	25.7202	43.3333	29.881	12.5	17.1667	139	22	-13.6273
PI494851	-	Zambia	VI	24.9926	40.8333	26.6369	12.5	20	140	23	-25.687
PI567350A	Shu pi huang dou	China	VI	27.7812	51.6667	24.375	9.58333	25.5	141	27	-6.10865
PI170886	-	South Africa	VI	28.1171	36.6667	34.8512	-	12.8333	142	18	-19.4611
PI159094	35S377	South Africa	VII	26.8021	42.5	34.375	9.83333	20.5	143	20	-11.3054
PI221717	-	South Africa	VI	25.314	40.8333	28.8393	17.9167	13.6667	144	21	-22.0812
PI374221	Welkom	South Africa	VI	26.6711	34.1667	29.0179	28.75	14.75	145	22	-24.1659
PI553039	Davis	United States	VI	25	40	23.75	15.4167	20.8333	146	22	-22.7439
PI279081	Masterpiece	South Africa	VII	29.9598	34.1667	46.5476	25.625	13.5	147	21	-23.6705
PI374219	Blyvoor	South Africa	VI	28.8899	47.5	32.9762	24.5833	10.5	148	23	-7.44515
PI548660	Bragg	United States	VII	26.4792	44.1667	19.1667	21.6667	20.9167	149	21	-17.8595
PI381662	Hernon 49	Uganda	VI	27.3199	37.5	32.1131	14.1667	25.5	150	17	-6.6033
PI617045	NC-Roy	United States	VI	26.4539	36.6667	30.9821	19.1667	19	151	22	-21.3328
PI330633	-	South Africa	VII	25.9048	38.3333	27.619	17.5	20.1667	152	26	-17.0045
PI424131	Buffalo	Zimbabwe	VII	27.3735	35.8333	26.1607	22.5	25	153	24	-28.203
PI430737	Oribi	Zimbabwe	VII	30.8433	49.1667	27.1131	-	16.25	154	21	-11.2657
PI567377B	(Ba yue zha)	China	VI	33.6944	63.3333	32.3611	12.9167	26.1667	155	22	-17.6495
PI159096	41S77	South Africa	VII	30.7068	51.6667	29.494	25	16.6667	156	20	-33.9637
PI381663	Kakira 1	Uganda	VI	34.9315	55	45.0595	20	19.6667	157	25	-34.3883
NCC06-1090	-	United States	VI	32.4122	39.1667	38.8988	23.75	27.8333	158	11	13.7411
PI639573	-	Burundi	VIII	32.7827	39.1667	36.9643	30	25	159	26	-34.2717
PI599333	Musen	United States	VI	32.7976	52.5	31.6071	20	27.0833	160	16	7.08965
PI417562	54.S.30 DL/64/185	South Africa	VI	35.683	45.8333	35.9821	36.25	24.6667	161	17	-11.4782
PI330635	-	South Africa	VII	39.127	52.5	39.881	-	25	162	23	-20.6996
a Country of origin of the accession based on GRIN data.
b Maturity group.
c Number of alleles from all significant SNPs with an effect that reduces canopy wilting score.
d Breeding value determined by adding the allelic effects for all significant SNPs individually by environment, and then summing the breeding values across individual environments.

## Sheet: Top, Bottom, and Checks
				Canopy Wilting Score
Accession	Name	Countrya	MGb	ALL-PANEL	GA-15-PANEL	GA-16-PANEL	KS-15-PANEL	KS-16-PANEL	Rank	Beneficial Allelesc	Breeding Valued
Slow wilting
PI603535	Hei zong huang dou	China	VIII	5.61756	10	5.80357	5.83333	0.833333	1	18	-31.803
PI603513A	Xiao niu mao huang	China	VIII	6.95685	9.16667	7.41071	6.25	5	2	23	-19.1178
PI603529	Hei huang dou	China	VIII	7.89683	11.6667	10.3571	-	1.66667	3	15	15.5526
PI603513B	-	China	VIII	8.45238	12.5	9.52381	-	3.33333	4	28	-17.3295
PI603534A	Da niu mao huang	China	VII	7.56845	6.66667	11.6071	7.5	4.5	5	26	-15.6219
PI219698	Kulat	Pakistan	VI	10.4861	17.5	10.625	-	3.33333	6	25	-32.4565
PI532458	Ba yue bao	China	VIII	9.83631	23.3333	10.1786	3.33333	2.5	7	22	-25.0056
PI269518B	(Koolat)	Pakistan	VI	10.8155	20.8333	8.77976	-	2.83333	8	22	-25.1621
PI567405	Wei zi dou	China	VI	8.62798	10	11.8452	6.66667	6	9	27	5.93388
PI603521	Huang dou	China	VIII	9.91815	17.5	8.42262	8.75	5	10	16	-14.8602
Checks
PI416937	Houjaku Kuwazu	Japan	VI	18.4494	39.1667	15.7143	8.33333	10.5833	79	23	-34.0972
PI595645	Benning	United States	VII	23.2128	37.5	24.4345	11.25	19.6667	132	23	-1.84173
Fast wilting
PI424131	Buffalo	Zimbabwe	VII	27.3735	35.8333	26.1607	22.5	25	153	24	-28.203
PI430737	Oribi	Zimbabwe	VII	30.8433	49.1667	27.1131	-	16.25	154	21	-11.2657
PI567377B	(Ba yue zha)	China	VI	33.6944	63.3333	32.3611	12.9167	26.1667	155	22	-17.6495
PI159096	41S77	South Africa	VII	30.7068	51.6667	29.494	25	16.6667	156	20	-33.9637
PI381663	Kakira 1	Uganda	VI	34.9315	55	45.0595	20	19.6667	157	25	-34.3883
NCC06-1090	-	United States	VI	32.4122	39.1667	38.8988	23.75	27.8333	158	11	13.7411
PI639573	-	Burundi	VIII	32.7827	39.1667	36.9643	30	25	159	26	-34.2717
PI599333	Musen	United States	VI	32.7976	52.5	31.6071	20	27.0833	160	16	7.08965
PI417562	54.S.30 DL/64/185	South Africa	VI	35.683	45.8333	35.9821	36.25	24.6667	161	17	-11.4782
PI330635	-	South Africa	VII	39.127	52.5	39.881	-	25	162	23	-20.6996
a Country of origin of the accession based on GRIN data.
b Maturity group.
c Number of alleles from all significant SNPs with an effect that reduces canopy wilting score.
d Breeding value determined by adding the allelic effects for all significant SNPs individually by environment, and then summing the breeding values across individual environments.
